# Supplementary material for: Comparative Genomic and Transcriptomic Characterization of the Toxigenic Marine Dinoflagellate Alexandrium ostenfeldii
Source: PLoS One. 2011 Dec 2;6(12):e28012. doi: 10.1371/journal.pone.0028012 (PMC3229502; doi:10.1371/journal.pone.0028012)
Supplement: File S8 — Overview of stop codon usages in dinoflgellate and other chromalveolates. (XLS) [file pone.0028012.s008.xls]

## Sheet: Tabelle1
species	data derived from…	no. of total stop codons	uga	uag	uaa	uga [%]	uag [%]	uaa [%]
Dinoflagellates
Alexandrium ostenfeldii	this study	97	74	16	7	76.29	16.49	7.22
Alexandrium minutum	this study	165	127	25	13	76.97	15.15	7.88
Alexandrium tamarense	Hackett et al. 2005	507	411	71	25	81.07	14.00	4.93
Alexandrium catenella	Uribe et al. 2008	/	/	/	/	72.70	20.70	6.50
Karlodinium micrum	Codon Usage Database (GenBank Release 160.0, June 2007)	26	8	7	11	30.77	26.92	42.31
Heterocapsa triquetra	Codon Usage Database (GenBank Release 160.0, June 2007)	42	38	1	3	90.48	2.38	7.14
Symbiodinium sp.	Codon Usage Database (GenBank Release 160.0, June 2007)	44	30	5	9	68.18	11.36	20.45
other Chromalveolates:
Perkinsus marinus	Codon Usage Database (GenBank Release 160.0, June 2007)	12	1	3	8	8.33	25.00	66.67
Toxoplasma gondii	Codon Usage Database (GenBank Release 160.0, June 2007)	1173	510	281	382	43.48	23.96	32.57
Plasmodium vivax	Codon Usage Database (GenBank Release 160.0, June 2007)	419	71	87	261	16.95	20.76	62.29
Plasmodium falciparum	Codon Usage Database (GenBank Release 160.0, June 2007)	1454	197	236	1021	13.55	16.23	70.22
Plasmodium berghei	Codon Usage Database (GenBank Release 160.0, June 2007)	107	6	13	88	5.61	12.15	82.24
Cryptosporidium parvum	Codon Usage Database (GenBank Release 160.0, June 2007)	643	95	134	414	14.77	20.84	64.39
Theileria annulata	Codon Usage Database (GenBank Release 160.0, June 2007)	172	1	10	161	0.58	5.81	93.60
Phytophthora ramorum	Codon Usage Database (GenBank Release 160.0, June 2007)	69	9	29	31	13.04	42.03	44.93
Phytophthora sojae	Codon Usage Database (GenBank Release 160.0, June 2007)	134	28	42	64	20.90	31.34	47.76
Phaeodactylum tricornutum	Codon Usage Database (GenBank Release 160.0, June 2007)	47	3	6	38	6.38	12.77	80.85
Emiliania huxleyi	Codon Usage Database (GenBank Release 160.0, June 2007)	472	88	91	293	18.64	19.28	62.08
